# Supplementary material
Source: PubMed Central journal article supplement (PMC4191757)
Supplement: pnas.201409653SI.pdf [file pnas.201409653SI.pdf]

# Supporting Information

Chen et al. 10.1073/pnas.1409653111

## SI Methods

### Establishment and Maintenance of Glioma Progenitor Cultures.

Whole forebrain tissue was minced and digested with media containing 0.2% collagenase (C-5138; Sigma), 0.01% hyaluronidase (H3884; Sigma), and 0.002% DNaseI (DN25-1G; Sigma) at 37 °C for 30 min. The dissociated brain cells were cultured in neurosphere media, which was neurobasal media (21103-049; Life Technologies) supplemented with 1× B27 without vitamin A (12587-010; Life Technologies), 1× penicillin–streptomycin (PenStrep) (15140-122; Life Technologies), 1× GlutaMax (35050; Life Technologies), 20 ng/mL EGF (11376454001; Roche), 20 ng/mL b-FGF (GF003; Millipore), 0.2% neural survival factor-1 (NSF-1) (CC-4323; Lonza), 16 unit/mL heparin (Sigma), and 5 ng/mL LIF (LIF1010; Millipore). The *p53* status of each of the five lines (three lines of *p53*<sup>+/-</sup> and two lines of *p53*<sup>-/-</sup>) was genotyped by PCR (primers: *p53*ko-F 5'-ACA GCG TGG TGG TAC CTT AT, *p53*ko-R 5'-TAT ACT CAG AGC CGG CCT, and *p53*neo-F 5'-AAT TAA GGG CCA GCT CAT TCC). The cultures were maintained as previously described (1) at 5% CO<sub>2</sub> and 3% O<sub>2</sub> unless otherwise indicated and passaged every 4–7 d by gentle trituration of the spheres through pipets to make a single-cell suspension. Culture appearance changed in a dynamic fashion over time after seeding; cells initially formed adherent monolayers, after which they expanded sequentially to semi-adherent monolayer, attached spheres, and suspended spheres.

### Manipulation of IDH1, GLUD1, and GLUD2 in Glioma Progenitor Cultures.

Human and mouse isocitrate dehydrogenase 1 (IDH1) cDNAs, human PDGF-BB cDNA, and human glutamate dehydrogenases 1 and 2 (GLUD1 and GLUD2) cDNAs were cloned by RT-PCR. The IDH1 cDNAs were mutated (R132H: CGT to CAT) by PCR-mediated mutagenesis and tagged (myc or Flag) at either 5' or 3' of the coding region. Mouse IDH1 shRNA sequences were obtained from The RNAi Consortium, with the DNA barcodes CCTGGGCTTAGAATGAGTCTT (TRCN0000041713), GCTGCTTGCAATAAGGCTTA (TRCN0000041715), and GCCAATTAGCTCAGGCCAAA (TRCN0000041717). Coding regions of the genes or DNA fragments containing the shRNA sequences were inserted at NcoI site in a Cal12Nco-derived Nco/ATG adaptor plasmid then cloned at ClaI site of a RCASBP amphitropic vector (from Memorial Sloan Kettering Cancer Center). All of the vectors were constructed using standard cloning procedures, and their sequences were verified at every step. Plasmid DNA of the replication-competent avian sarcoma leukosis virus long terminal repeat with splice acceptor (RCAS) vector expressing the interested gene was transfected by electroporation into chicken DF1 cells [CRL-12203; American Type Culture Collection (ATCC)]. The RCAS virus-producing DF1 cells were cultured in Dulbecco's modified Eagle medium supplemented with 2 mM glutamine and 10% (vol/vol) FBS (F2442; Sigma). DF1 cells at over 90% confluence were then cultured with minimum volumes of neurosphere media for 16–20 h. Supernatants of the culture were filtered and used to infect targeted cells in the presence of polybrene (TR-1003-G; Millipore) at 8 μg/mL. For murine IDH1<sup>R132H</sup> and IDH1 shRNA constructs, targeted cells were repeatedly infected to achieve desired levels of transgene expression or IDH1 knockdown. All of the three shRNAs resulted in significant IDH1 knockdown in mouse glioma progenitors (82–91% mRNA decrease, as quantified by Taqman). To investigate rescue of deficits induced by IDH1<sup>R132H</sup> or IDH1 knockdown, cultures stably expressing murine or human IDH1<sup>R132H</sup> or shRNA to murine IDH1 (as a result of infection with appropriate RCAS

vectors) were subsequently infected with RCAS vectors encoding for IDH1<sup>WT</sup>, GLUD1, or GLUD2.

**Knockdown of Glutamate Dehydrogenase in Human IDH1 Mutant Glioma Cultures.** Human IDH1<sup>R132H</sup>-glioma line BT142 (ATCC SRC-4002) was cultured in NeuroCult NS-A basal media (Stem Cell Technology) supplemented with 1× NeuroCult NS-A proliferation supplement (Stem Cell Technology), 1× PenStrep (15140-122; Life Technologies), 1× MEM Nonessential amino acids (11140-050; Life Technologies), 1 mM sodium pyruvate (11360-070; Life Technologies), 20 nM EGF (11376454001; Roche), 20 nM b-FGF (GF003; Millipore), 100 ng/mL human recombinant PDGF-AA (100-13A; PeproTech), 0.2% NSF-1 (CC-4323; Lonza), 16 units/mL heparin (H3393-1MU; Sigma), and 5 nM LIF (LIF1010; Millipore). Sequencing results confirmed that cells after passages contained homozygous IDH1<sup>R132H</sup>.

BT142 cells were infected at a multiplicity of infection of 10 with lentiviral vectors expressing control shRNA (sc-108080; Santa Cruz Technology) or glutamate dehydrogenase 1/2 shRNAs (Sigma), which were sh589, DNA barcode CCTCAAATATGA-AAGGGATT (TRCN0000028589); sh614, DNA barcode GCTGCTATGTCAATGCCA (TRCN0000028614); sh620, DNA barcode GCTAGCAAAGAAGGGCTTT (TRCN0000028620); sh647, DNA barcode GCAGAGTTCCAAGACAGTA (TRCN0000028647); and sh662, DNA barcode GCCTACACTCTATGAGATATT (TRCN0000028662). The infected cells were selected in culture in the presence of puromycin at 2 μg/mL. Glutamate dehydrogenase 1/2 knockdown was verified by Western blot.

**Measurement of 2-Hydroxyglutarate.** Relative levels of 2-hydroxyglutarate (2-HG) were measured from supernatants of cells used for growth assays. Absolute levels of 2-HG were measured from supernatants and pellets of pooled and clonal cells expressing human or murine IDH1<sup>R132H</sup>. The supernatants were collected 3 d after 2.5 × 10<sup>5</sup> cells were cultured in 3 mL of media in six-well plates. The uncultured media were used as negative control. The cells were precipitated and the cell numbers were counted for normalization. Samples were extracted with acetonitrile. A Thermo Accela UPLC pump was used to deliver a gradient flow to elute the analytes from the analytical column (Phenomenex Synergi polar-RP) to the mass spectrometer (API 5500 Qtrap; AB Sciex). Selected reaction monitoring transition of 2-HG was 147 → 129. Dwell time was 80 ms per channel with an interchannel delay of 5 ms. Using a standard curve, the concentrations of 2-HG in cell pellets were estimated at 0.11–0.21 mM in cell pellets of control cells and 1.9–16 mM in cells with mouse IDH1 mutation.

**Cell Growth Assays.** In vitro behavior of uninfected glioma progenitor culture (control) was compared with the same line infected with RCAS vector(s) engineered to express human or murine IDH1<sup>R132H</sup> (hMUT or mMUT), shRNA to murine IDH1 (KD), human GLUD1 (GLUD1), human GLUD2 (GLUD2), or sequential infections with human or murine IDH1<sup>R132H</sup> followed by a second vector, human IDH1<sup>WT</sup> (hMUT+hWT), murine IDH1<sup>WT</sup> (mMUT+mWT), GLUD1 (MUT+GLUD1), or GLUD2 (MUT+GLUD2).

For the cloning assay, viable single cells were FACS-sorted at one cell per well into 96-well plates and cultured with 100 μL of neurosphere media under 3% oxygen and 5% CO<sub>2</sub> at 37 °C. To the cultures were added, once a week for up to 4 wk, 25 μL of the fresh media containing 2× of the supplements (B27 without vitamin A, EGF, bFGF, LIF, and NSF-1). Clone formation was

scored by microscopic inspection at 3–4 wk following FACS plating of single cells into standard neurosphere conditions in 3% oxygen and is reported as percentage of cells generating a viable clone.

For the CyQuant assay, viable single cells were FACS-sorted at 1,000 cells per well into 96-well plates and cultured under 3% oxygen and 5% CO<sub>2</sub> at 37 °C for 4 d. Cell numbers, reported as relative fluorescence units, were determined using CyQuant Cell Proliferation Assay Kit (C7026; Life Technologies) according to the manufacturer's directions.

For IncuCyte, viable single cells were FACS-sorted at 1,000 cells per well into 96-well plate, cultured under room air and 5% CO<sub>2</sub> at 37 °C for 7 d, and imaged using the IncuCyte ZOOM system (Essen BioScience). The cultures grew as adherent monolayers for the first 120 h after plating. Phase contrast images were automatically acquired and registered, and percentages of confluence of the cells were averaged by the IncuCyte software system at 2-h intervals from three separate regions per well.

**Lipid Synthesis from Glucose, Glutamine, or Glutamate.** Lipid synthesized from glucose, glutamine, or glutamate was assessed in glioma progenitor cells grown in 20%, 3%, or 1% oxygen. Total labeled carbons from glucose and glutamine in cells under 3% oxygen are reported in Fig. 3C and those from glucose, glutamine, or glutamate in the cells under 20%, 3%, or 1% oxygen in Fig. S4.

For measuring <sup>14</sup>C-labeled lipids derived from glucose, glutamine, or glutamate to lipids, cells were seeded in 12-well plates at 10E+5 cells per well, cultured for 2 d under 1% O<sub>2</sub>, 3% O<sub>2</sub>, or room air in the neurosphere media containing 25 mM glucose and 2 mM glutamine then incubated for 5 h with L-[<sup>14</sup>C(U)]glutamine (NEC451050UC; PerkinElmer) at final concentration of 4.0 μM, or D-[<sup>14</sup>C]glucose (NEC042V250UC; PerkinElmer) at final concentration of 8.6 μM, or L-[<sup>14</sup>C(U)]glutamic acid (NEC290E050UC; PerkinElmer) at final concentration of 2.0 μM. Specific activities of all tracers were equivalent. Cells were harvested and resuspended in 100 μL PBS buffer, of which 5 μL were used for determining cell numbers by CyQuant assay and 90 μL for lipid extraction. Total lipids were extracted with methanol/chloroform/HCl. All extractions were performed either in siliconized tubes or in glass tubes. Radioactivities of the extracts were counted using liquid scintillation analyzer (Tri-Carb 2810TR; PerkinElmer). For glutamate, unadjusted cpm are reported. For glucose and glutamine, cpm measured were adjusted to reflect the ratio of tracer to unlabeled metabolite in media.

Analysis for labeled lipids derived from each metabolite is based on cpm per thousand cells analyzed on a logarithmic scale, separately for each oxygen level, with a linear mixed model estimating a mean response for each metabolite + genotype combination, and including assay ID as a random intercept. Total flux was estimated by anti-logging the estimated responses from the mixed model for each combination then adding or subtracting the estimated cpm counts appropriately. SEs were estimated by the method of propagation of errors. Computations were performed in R version 3.0.2, with mixed models (2) and panel plots created using the packages nlme (3) and lattice (4), respectively.

For mass isotopologue distribution analysis using <sup>13</sup>C stable isotopes, cells were cultured for 24 h in each well of a six-well plate with 2 mL neurosphere culture media containing 1 mM glutamine and 1 mM [<sup>13</sup>C-U5]glutamine. One well was used for quantification of the cell numbers; five wells of the cells and the supernatants were harvested and processed for mass spectrometry. Citrate, α-KG, and 2-HG isotopologues were measured by liquid chromatography–triple quadrupole TOF mass spectrometer (TripleTOF 5600; AB Sciex). Cells were washed once with PBS, lysed, and scraped in cold lysis buffer composed of acetonitrile:methanol:H<sub>2</sub>O (4.5:4.5:1) on ice, sonicated in a cold water bath for 30 s, then spun at 14,000 × g at 4 °C for 10 min. Supernatants were collected for MS analysis. Ten microliters of each

sample were injected onto a 3- × 150-mm StableBond column (Zorbax Aq 5 μm; Agilent) and eluted isocratically in water with 0.1% formic acid by volume at a flow rate of 500 μL/min. Data were collected with TOF MS scan function at a 400-ms scan time and 4.5-min run time. Monoisotopic *m/z* with a 10-mDa window was used for data integration of each analyte. Retention time for each analyte was confirmed with purified standards. MultiQuant Software (AB Sciex) was used for data analysis.

**Expression Profiling.** Three sets of expression profiling data from previously published studies were used to compare *IDH1*<sup>R132H</sup> vs. *IDH1*<sup>WT</sup> human high-grade glioma. Mean fold change and mean *P* value for three separate comparisons of *IDH1*<sup>R132H</sup> vs. *IDH1*<sup>WT</sup> tumors are reported. Dataset 1 consisted of AffyU133A&B profiles of primary newly diagnosed glioblastomas (GBMs) (*n* = 18 *IDH1*<sup>R132H</sup> and 63 *IDH1*<sup>WT</sup>), and dataset 2 contained Affy U133P data from *n* = 12 *IDH1*<sup>R132H</sup> and 88 *IDH1*<sup>WT</sup> primary newly diagnosed GBMs. Dataset 3 contained Affy U133 A&B profiles from *n* = 16 *IDH1*<sup>R132H</sup> and 12 *IDH1*<sup>WT</sup> newly diagnosed untreated grade III astrocytomas. To identify genes overexpressed in *IDH1* mutant tumors, AffyMassig5 values for all probesets on the microarray were compared *IDH1*<sup>R132H</sup> vs. *IDH1*<sup>WT</sup> tumors. All probesets for which mean expression showed twofold or greater difference with a *t* test *P* value less than 1 × 10<sup>-4</sup> in all three datasets are reported in Fig. 2A.

RNA sequencing (RNAseq) data for GLUD1 and GLUD2 in GBM tumor samples collected by The Cancer Genome Atlas (TCGA) (5) was looked at as a function of *IDH1* mutation status. RNAseq data were obtained from the Cancer Genomics Hub at the University of California, Santa Cruz and preprocessed and aligned with HTSeqGenie (6). *IDH1* somatic mutation calls obtained from Illumina GA exome-seq data and processed by the Broad Institute were downloaded from the TCGA data portal (<https://tcga-data.nci.nih.gov/tcga/>). Analysis was restricted to 150 GBM tumor samples with both RNAseq and Exome-seq data available, of which 9 were mutant for *IDH1*<sup>R132</sup> and 141 WT. Nonparametric statistical analysis was used to compare reads for GLUD1 and GLUD2 in *IDH1*<sup>R132H</sup> vs. *IDH1*<sup>WT</sup> samples.

**Western Blots.** Total cell lysates were used for Western blots. Primary antibodies used all recognize both mouse and human proteins and were as follows: rabbit anti-*IDH1* polyclonal antibody (3997S; Cell Signaling), mouse anti-human *IDH1* monoclonal antibody (clone H09, Dia-H09; Dianova), mouse anti-GLUD monoclonal antibody (Clone 3C2, H00002746-M01; Abnova), rabbit GLUD polyclonal antibody (LS-B2525; Life-Span BioSciences), and mouse anti-actin monoclonal antibody (612656; BD Transduction Laboratories). Secondary antibodies were donkey anti-rabbit IgG–HRP (NA934V; GE Healthcare) and sheep anti-mouse IgG–HRP (NA931V; GE Healthcare). ECL (PRN2109; GE Healthcare) was used for protein detection.

**In Vivo Glioma Growth.** Incidence of glioma formation was tested in immunocompromised mice implanted with *p53*<sup>+/-</sup> Nestin-tva or *p53*<sup>-/-</sup> Nestin-tva neural stem cultures engineered to express PDGF-B or human *IDH1*<sup>R132H</sup> using RCAS vector. Effects of shRNA to GLUD1/2 was tested in immunocompromised mice implanted with *IDH1*<sup>R132H</sup> human glioma line BT142 engineered to express control shRNA (shCtr) or shRNAs to human GLUD1/2 (sh647, sh662). Orthotopic growth of grafts were assessed by T2-weighted MRI 3 mo postimplantation.

Stereotactic implantation of cells into the right striatum was conducted under isoflurane-induced anesthesia using aseptic technique. Body weights were monitored every day during the first week after the surgery and twice per week thereafter. For survival studies, mice were killed when they lost 20% of their body weight or became moribund.



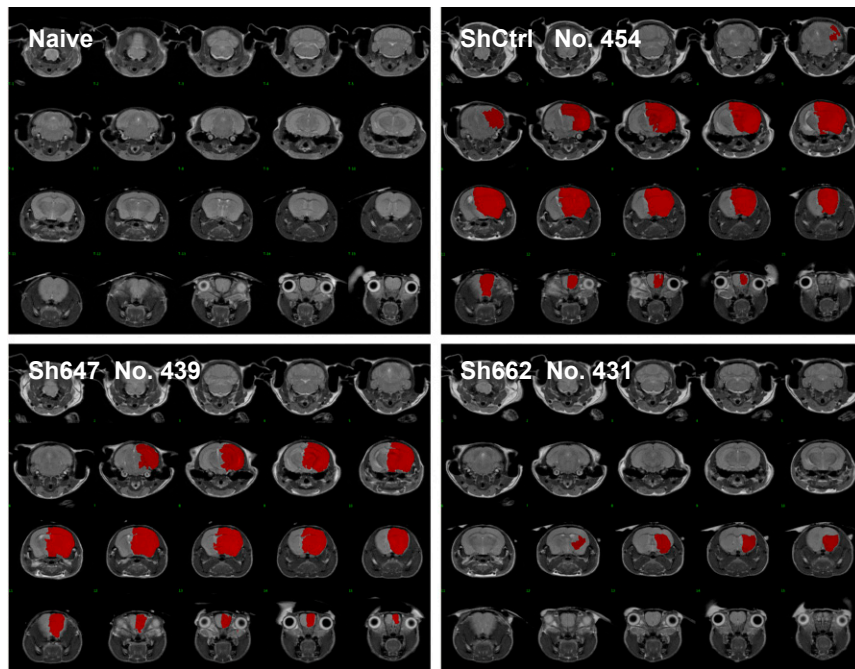

**Fig. S2.** Knockdown of GLUD1/2 inhibits orthotopic growth of an *IDH1<sup>R132H</sup>* glioma line. Entire T2-MRI series of a representative mouse from naïve, shCtrl, sh647, and sh662 groups, respectively. Colored area represents region quantified as tumor.

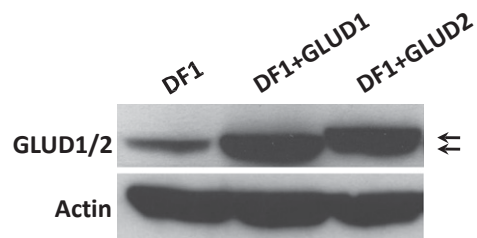

**Fig. S3.** Both human GLUD1 and GLUD2 are recognized by anti-GLUD antibody. Total cell lysates from chicken fibroblast DF1 cells transduced with RCAS vectors expressing human GLUD1 or GLUD2 were run on a long 8% Tris-glycine gel. Western blotting was performed using monoclonal antibody to GLUD (Clone 3C2, H00002746-M01; Abnova). The arrows point to positions of the bands representing GLUD1 and GLUD2.



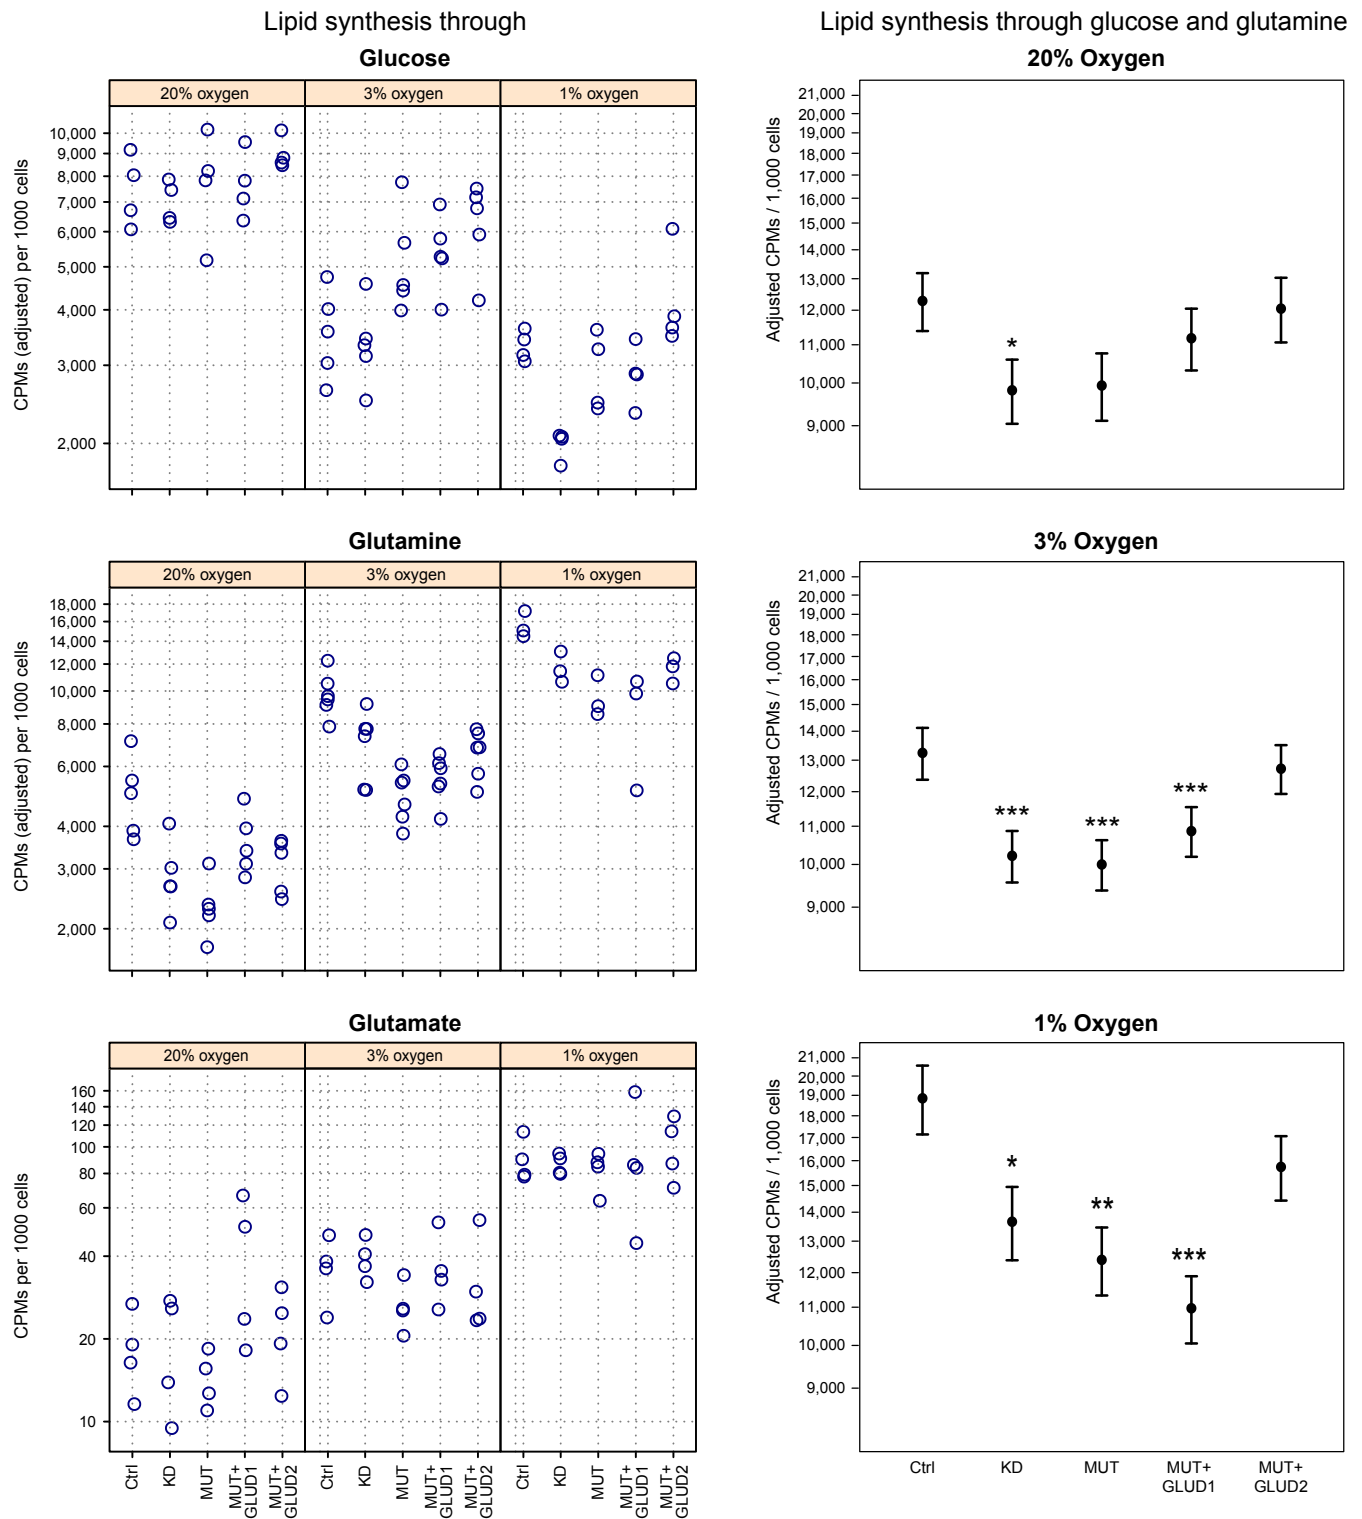

**Fig. S4.** Effects of IDH1 status, GLUD1/2, and oxygen levels on metabolite flux to lipid in IDH1<sup>R132H</sup> glioma progenitors. Cells were grown in 20, 3, or 1% oxygen in standard tissue culture media with [<sup>14</sup>C]glutamine, [<sup>14</sup>C]glucose, or [<sup>14</sup>C]glutamate tracer. A minimum of three experiments was conducted for each line of the cells under each of the oxygen conditions. (Left) Each circle represents data from one experiment. (Right) Summary plots of total flux from glucose and glutamine. \**P* < 0.05, \*\**P* < 0.01, \*\*\* for *P* < 0.001 for comparison with control, mixed linear effects test.

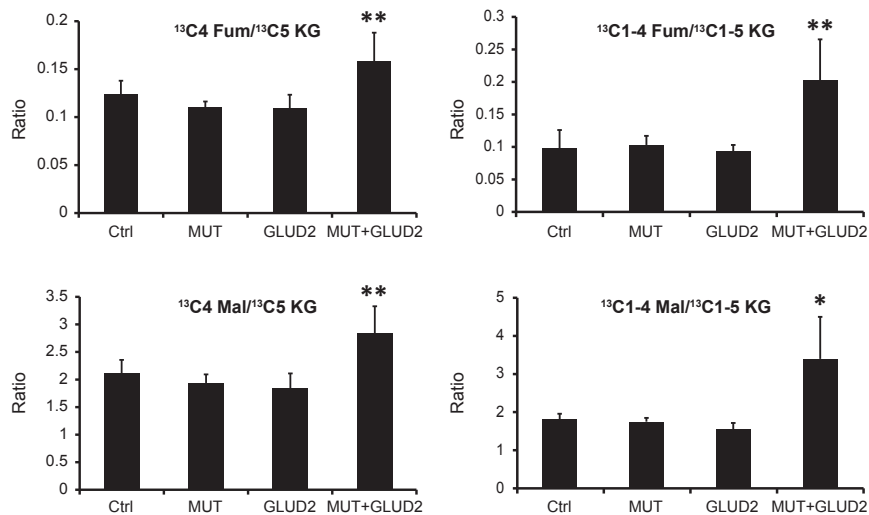

**Fig. S5.** Effects of GLUD2 on ratios of tricarboxylic acid cycle metabolites with incorporation of  $^{13}\text{C}$  derived from  $^{13}\text{C}_5$  glutamine. (Upper Left) Fumarate ( $^{13}\text{C}_4$ ) produced from  $^{13}\text{C}_5\text{-}\alpha\text{-KG}$  vs.  $^{13}\text{C}_5\text{-}\alpha\text{-KG}$ . (Upper Right) All labeled fumarate ( $^{13}\text{C}_1$ -,  $^{13}\text{C}_2$ -,  $^{13}\text{C}_3$ -, and  $^{13}\text{C}_4$ -fumarate combined) produced from all labeled  $\alpha\text{-KG}$  ( $^{13}\text{C}_1$ -,  $^{13}\text{C}_2$ -,  $^{13}\text{C}_3$ -, and  $^{13}\text{C}_5\text{-}\alpha\text{-KG}$  combined, no  $^{13}\text{C}_4\text{-}\alpha\text{-KG}$  detected). (Lower Left) Malate ( $^{13}\text{C}_4$ -) produced from  $^{13}\text{C}_5\text{-}\alpha\text{-KG}$  vs.  $^{13}\text{C}_5\text{-}\alpha\text{-KG}$ . (Lower Right) All labeled malate ( $^{13}\text{C}_1$ -,  $^{13}\text{C}_2$ -,  $^{13}\text{C}_3$ -, and  $^{13}\text{C}_4$ -malate combined) vs. all labeled  $\alpha\text{-KG}$ . \* $P < 0.05$ , \*\* $P < 0.01$ , for GLUD2 effect compared with Ctrl (for GLUD2) or MUT (for MUT + GLUD2).

**Table S1.** Knockdown of GLUD1/2 alleviates metabolic changes in grafted  $\text{IDH1}^{\text{R132H}}$  tumor

| Metabolite    | shCtrl     |           | sh647      |         |         | sh662      |         |         | Brain      |           |         |
|---------------|------------|-----------|------------|---------|---------|------------|---------|---------|------------|-----------|---------|
|               | Mean       | SEM       | Mean       | SEM     | P       | Mean       | SEM     | P       | Mean       | SEM       | P       |
| 2-HG          | 2,029,969  | 138,096   | 1,846,208  | 156,919 | 3.9E-01 | 904,887    | 65,914  | 8.1E-05 | 65,459     | 7,167     | 3.3E-06 |
| a-KG          | 41,935     | 3,653     | 32,199     | 2,136   | 4.4E-02 | 24,087     | 1,227   | 1.6E-03 | 9,156      | 1,043     | 1.1E-04 |
| ADP           | 4,412,331  | 1,003,058 | 4,039,861  | 248,871 | 1.8E-01 | 5,045,420  | 403,233 | 5.2E-01 | 3,368,092  | 1,029,300 | 4.7E-01 |
| Alanine       | 1,070,280  | 44,982    | 790,349    | 63,155  | 4.3E-03 | 682,141    | 44,163  | 2.7E-05 | 675,550    | 35,181    | 2.4E-04 |
| Arginine      | 1,640,117  | 130,769   | 997,262    | 101,043 | 2.6E-03 | 996,188    | 86,287  | 2.7E-03 | 1,582,142  | 13,244    | 7.2E-01 |
| Aspartic acid | 1,354,247  | 98,990    | 1,381,786  | 53,888  | 8.2E-01 | 1,904,255  | 122,059 | 2.1E-02 | 3,078,510  | 197,682   | 2.7E-05 |
| Carnitine     | 7,809,486  | 333,910   | 7,073,319  | 269,256 | 1.1E-01 | 7,388,665  | 595,440 | 1.5E-01 | 4,925,240  | 196,750   | 2.0E-04 |
| Citrate       | 4,499,887  | 159,413   | 3,996,365  | 121,374 | 3.1E-02 | 2,865,366  | 119,556 | 9.6E-06 | 1,262,643  | 46,714    | 3.1E-07 |
| Cysteine      | 104,988    | 7,527     | 103,939    | 4,156   | 9.0E-01 | 84,696     | 4,989   | 2.9E-02 | 100,864    | 14,460    | 7.8E-01 |
| Fumarate      | 89,947     | 6,506     | 64,123     | 4,389   | 7.8E-03 | 63,955     | 4,605   | 1.1E-02 | 76,931     | 12,662    | 3.3E-01 |
| G6P           | 1,043,500  | 33,139    | 924,454    | 15,309  | 8.3E-03 | 800,747    | 27,826  | 4.0E-04 | 828,521    | 82,000    | 2.1E-02 |
| Ghyde3P       | 88,665     | 8,906     | 107,646    | 5,669   | 1.0E-01 | 91,600     | 5,378   | 9.9E-01 | 103,683    | 10,510    | 3.1E-01 |
| Glucose       | 90,890     | 22,698    | 110,869    | 16,295  | 5.0E-01 | 24,592     | 4,459   | 2.8E-02 | 3,451      | 1,993     | 1.6E-02 |
| Glutamate     | 1,3207,010 | 348,604   | 13,583,858 | 366,966 | 4.8E-01 | 16,003,026 | 411,301 | 1.7E-02 | 19,566,127 | 359,633   | 9.9E-07 |
| Glutamine     | 12,301,912 | 349,596   | 14,024,908 | 325,176 | 4.4E-03 | 152,75,496 | 434,894 | 2.8E-03 | 19,271,047 | 393,753   | 1.1E-06 |
| Gly3P         | 396,114    | 29,403    | 300,774    | 17,212  | 1.8E-02 | 285,960    | 26,188  | 1.5E-02 | 445,545    | 86,302    | 5.4E-01 |
| Glycine       | 329,628    | 20,808    | 273,146    | 13,650  | 4.4E-02 | 256,977    | 30,609  | 3.5E-02 | 190,324    | 2,675     | 1.6E-03 |
| GSH           | 13,265,389 | 229,192   | 12,764,489 | 230,156 | 4.5E-02 | 12,396,927 | 423,018 | 7.2E-03 | 12,956,936 | 25,121    | 8.2E-02 |
| GSSG          | 1,043,821  | 24,268    | 973,866    | 29,442  | 9.4E-02 | 525,838    | 40,778  | 2.5E-06 | 787,790    | 35,057    | 3.4E-04 |
| Lactate       | 1,854,257  | 104,008   | 1,620,928  | 25,201  | 5.0E-02 | 1,773,236  | 46,477  | 2.7E-01 | 1,702,158  | 34,602    | 2.8E-01 |
| Leu/Ile       | 3,867,708  | 221,557   | 3,228,534  | 183,849 | 4.6E-02 | 3,790,239  | 108,748 | 4.3E-01 | 4,240,770  | 79,871    | 2.3E-01 |
| Malate        | 1,419,868  | 61,022    | 1,184,092  | 71,433  | 2.8E-02 | 1,329,823  | 38,424  | 1.7E-01 | 1,422,542  | 137,541   | 1.0E+00 |
| NADP          | 208,215    | 10,145    | 180,386    | 2,869   | 2.4E-02 | 156,248    | 2,648   | 1.5E-03 | 164,969    | 5,875     | 1.1E-02 |
| Pento5P       | 318,925    | 11,018    | 344,638    | 14,290  | 1.8E-01 | 261,883    | 8,703   | 1.2E-03 | 269,443    | 45,196    | 2.2E-01 |
| Proline       | 4,921,874  | 264,085   | 4,525,651  | 234,793 | 2.8E-01 | 3,537,537  | 431,094 | 3.0E-03 | 1,627,664  | 30,336    | 9.8E-06 |
| PRPP          | 7,664      | 1,244     | 7,276      | 655     | 7.9E-01 | 9,834      | 1,621   | 3.8E-01 | 10,957     | 2,352     | 7.8E-01 |
| PRV           | 58,266     | 4,122     | 5,3571     | 2,149   | 3.4E-01 | 36,545     | 4,407   | 6.0E-03 | 43,068     | 11,943    | 1.9E-01 |
| Sedo7P        | 139,288    | 19,936    | 137,614    | 14,741  | 9.4E-01 | 87,360     | 3,714   | 4.0E-02 | 22,412     | 2,550     | 1.7E-03 |
| Serine        | 908,705    | 26,393    | 800,914    | 36,350  | 3.4E-02 | 937,113    | 44,101  | 1.0E+00 | 1,311,129  | 44,836    | 1.8E-05 |
| Succinate     | 663,882    | 42,174    | 573,600    | 1,1047  | 6.5E-02 | 534,394    | 39,221  | 1.4E-02 | 434,179    | 76,042    | 2.0E-02 |
| UMP           | 825,359    | 89,489    | 1,155,293  | 130,152 | 6.2E-02 | 2,032,611  | 142,017 | 1.3E-04 | 1,616,719  | 54,810    | 1.7E-04 |

The levels of each metabolite are presented as mean of normalized areas under the curve and SEM from six tumor samples (shCtrl, sh647, or sh662) or four brain tissues of matched normal mice (same age and sex as those of tumor-bearing mice). P value: with comparison with shCtrl, t test.
